# Supplementary material for: A controllable water signal transistor
Source: Royal Society of Chemistry journal article supplement (doi:10.1039/c6cp08664k), 2017-01-01
Supplement: c6cp08664k1.pdf [file c6cp08664k1.pdf]

## Supporting Information for

### A Controllable Water Signal Transistor

Lili Wu,<sup>1</sup> Xiaoyan Zhou,<sup>1</sup> Hangjun Lu,<sup>1</sup> Qing Liang,<sup>1</sup> Jianlong Kou,<sup>1</sup> Fengmin Wu,<sup>1</sup>

Jintu Fan<sup>2</sup>

<sup>1</sup>*Institute of Condensed Matter Physics, Zhejiang Province Key Laboratory of Solid State Optoelectronic Devices, Zhejiang Normal University, Jinhua 321004,*

*China, <sup>2</sup>Department of Fiber Science and Apparel Design, Cornell University,*

*Ithaca, New York 14853-4401, USA*

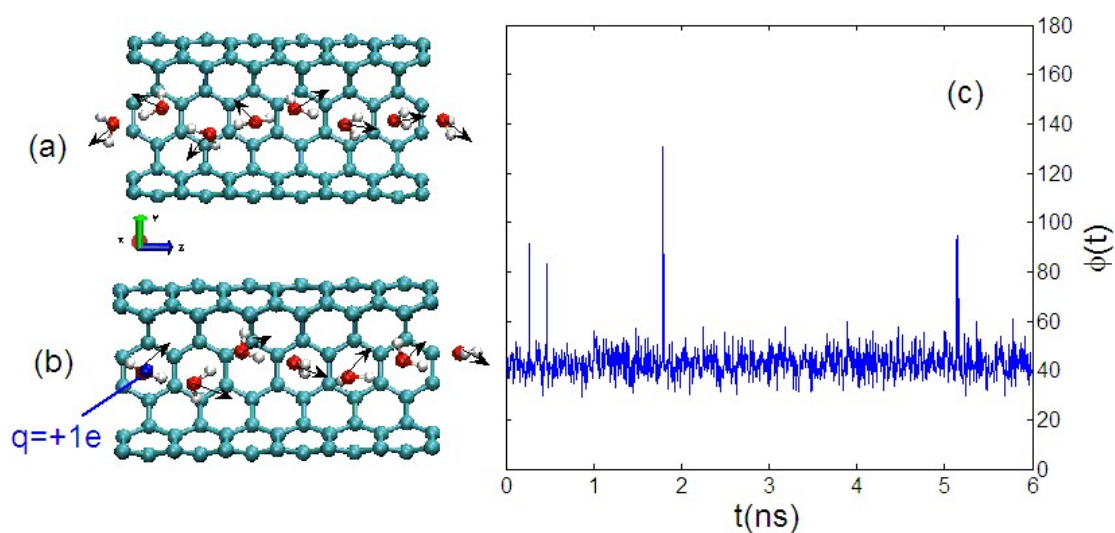

Figure S1: (a) A schematic snapshot of the system with a single channel in side view, (a) the initial state, (b) the end state with one charges, together with the trajectories (c) of average dipole angle  $\Phi(t)$  of the water orientations.
